# Supplementary material
Source: PubMed Central journal article supplement (PMC3289288)

## Supplementary Information:

**Figure S1:** Calculated Isotope distributions for the naturally acetylated (S1A) and *in vitro* d3-acetylated (S1B) tryptic peptide (residues 54-63) containing K56 of histone H3. S1C shows an overlaid plot of the both isotopic distributions. Note the overlap of the 4th isotope peaks of the naturally acetylated peptide with the monoisotopic peak of the d3-acetylated peptide. This overlap accounts for 8.60% of the area of the monoisotopic peak of the naturally acetylated peptide.

**Figure S2:** Calculated Isotope distributions for various isoforms of the d3-acetylated Histone H4 tail tryptic peptide (residues 4-17) containing (S2A) 0, (S2B) 1, (S2C) 2, (S2D) 3, and (S2E) 4 naturally acetylated lysines. S2F shows an overlaid plot of the isotopic distributions of all isoforms. Note the overlap of the 4 isotope peaks with monoisotopic peak of the isoform 3 Da heavier. This overlap is *ca.* 10.75% of the area of the monoisotopic peak.

FQK<sub>ac</sub> STELLIR

Elemental Composition: C<sub>58</sub>H<sub>98</sub>N<sub>15</sub>O<sub>17</sub>

Resolution: 5500

| Isotope Number | m/z        | Percent Total | Percent Maximum |
|----------------|------------|---------------|-----------------|
| 0              | 1276.72651 | 46.93         | 100.00          |
| 1              | 1277.72945 | 34.05         | 72.55           |
| 2              | 1278.73219 | 13.80         | 29.41           |
| 3              | 1279.73484 | 4.04          | 8.61            |
| 4              | 1280.73743 | 0.95          | 2.01            |
| 5              | 1281.73997 | 0.19          | 0.40            |
| 6              | 1282.74249 | 0.03          | 0.07            |
| 7              | 1283.74501 | 0.00          | 0.01            |
| 8              | 1284.74772 | 0.00          | 0.00            |
| 9              | 1285.75172 | 0.00          | 0.00            |

**S1A**

FQK<sub>d3-ac</sub> STELLIR

Elemental Composition: C<sub>58</sub>H<sub>95</sub>D<sub>3</sub>N<sub>15</sub>O<sub>17</sub>

Resolution: 5500

| Isotope Number | m/z        | Percent Total | Percent Maximum |
|----------------|------------|---------------|-----------------|
| 0              | 1279.74534 | 46.96         | 100.00          |
| 1              | 1280.74828 | 34.04         | 72.50           |
| 2              | 1281.75102 | 13.80         | 29.38           |
| 3              | 1282.75367 | 4.04          | 8.60            |
| 4              | 1283.75625 | 0.94          | 2.01            |
| 5              | 1284.75879 | 0.19          | 0.40            |
| 6              | 1285.76131 | 0.03          | 0.07            |
| 7              | 1286.76.83 | 0.00          | 0.01            |
| 8              | 1287.76654 | 0.00          | 0.00            |
| 9              | 1288.77055 | 0.00          | 0.00            |

**S1B**

# S1C

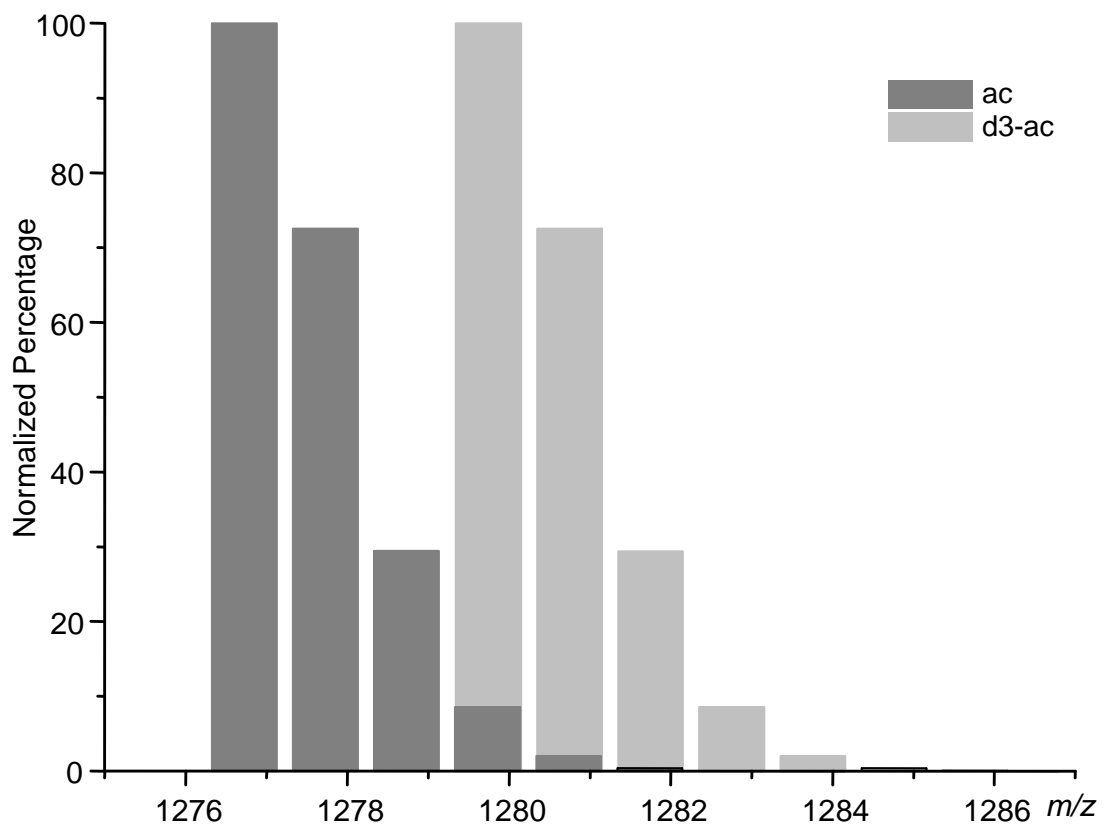

GK<sub>ac</sub>GGK<sub>ac</sub>GLGK<sub>ac</sub>GGAK<sub>ac</sub>R  
 Elemental Composition: C<sub>61</sub>H<sub>108</sub>N<sub>21</sub>O<sub>19</sub>  
 Resolution: 5500

| Isotope Number | m/z        | Percent Total | Percent Maximum |
|----------------|------------|---------------|-----------------|
| 0              | 1438.81304 | 44.12         | 100.00          |
| 1              | 1439.81584 | 34.57         | 78.34           |
| 2              | 1440.81847 | 15.07         | 34.16           |
| 3              | 1441.82103 | 4.74          | 10.74           |
| 4              | 1442.82354 | 1.19          | 2.69            |
| 5              | 1443.82601 | 0.25          | 0.57            |
| 6              | 1444.82846 | 0.05          | 0.10            |
| 7              | 1445.83088 | 0.01          | 0.02            |
| 8              | 1446.83340 | 0.00          | 0.00            |
| 9              | 1447.83648 | 0.00          | 0.00            |

**S2A**

GK<sub>d3-ac</sub>GGK<sub>ac</sub>GLGK<sub>ac</sub>GGAK<sub>ac</sub>R  
 GK<sub>ac</sub>GGK<sub>d3-ac</sub>GLGK<sub>ac</sub>GGAK<sub>ac</sub>R  
 GK<sub>ac</sub>GGK<sub>ac</sub>GLGK<sub>d3-ac</sub>GGAK<sub>ac</sub>R  
 GK<sub>ac</sub>GGK<sub>ac</sub>GLGK<sub>ac</sub>GGAK<sub>d3-ac</sub>R  
 Elemental Composition: C<sub>61</sub>H<sub>105</sub>D<sub>3</sub>N<sub>21</sub>O<sub>19</sub>  
 Resolution: 5500

| Isotope Number | m/z        | Percent Total | Percent Maximum |
|----------------|------------|---------------|-----------------|
| 0              | 1441.83651 | 44.11         | 100.00          |
| 1              | 1442.83931 | 34.57         | 78.38           |
| 2              | 1443.84195 | 15.08         | 34.20           |
| 3              | 1444.84451 | 4.74          | 10.76           |
| 4              | 1445.84702 | 1.19          | 2.70            |
| 5              | 1446.84950 | 0.25          | 0.57            |
| 6              | 1447.85194 | 0.05          | 0.10            |
| 7              | 1448.85437 | 0.01          | 0.02            |
| 8              | 1449.85688 | 0.00          | 0.00            |
| 9              | 1450.85995 | 0.00          | 0.00            |

**S2B**

$GK_{d3-ac}GGK_{d3-ac}GLGK_{ac}GGAK_{ac}R$ ,  $GK_{d3-ac}GGK_{ac}GLGK_{d3-ac}GGAK_{ac}R$ ,  
 $GK_{d3-ac}GGK_{ac}GLGK_{ac}GGAK_{d3-ac}R$ ,  $GK_{ac}GGK_{d3-ac}GLGK_{d3-ac}GGAK_{ac}R$ ,  
 $GK_{ac}GGK_{d3-ac}GLGK_{ac}GGAK_{d3-ac}R$ ,  $GK_{ac}GGK_{ac}GLGK_{d3-ac}GGAK_{d3-ac}R$   
 Elemental Composition:  $C_{61}H_{102}D_6N_{21}O_{19}$   
 Resolution: 5500

**S2C**

| Isotope Number | m/z        | Percent Total | Percent Maximum |
|----------------|------------|---------------|-----------------|
| 0              | 1444.85999 | 44.09         | 100.00          |
| 1              | 1445.86279 | 34.57         | 78.43           |
| 2              | 1446.86543 | 15.09         | 34.23           |
| 3              | 1447.86800 | 4.75          | 10.77           |
| 4              | 1448.87051 | 1.19          | 2.70            |
| 5              | 1449.87298 | 0.25          | 0.57            |
| 6              | 1450.87543 | 0.05          | 0.11            |
| 7              | 1451.87785 | 0.01          | 0.02            |
| 8              | 1452.88036 | 0.00          | 0.00            |
| 9              | 1453.88343 | 0.00          | 0.00            |

$GK_{d3-ac}GGK_{d3-ac}GLGK_{d3-ac}GGAK_{ac}R$   
 $GK_{d3-ac}GGK_{d3-ac}GLGK_{ac}GGAK_{d3-ac}R$   
 $GK_{d3-ac}GGK_{ac}GLGK_{d3-ac}GGAK_{d3-ac}R$   
 $GK_{ac}GGK_{d3-ac}GLGK_{d3-ac}GGAK_{d3-ac}R$   
 Elemental Composition:  $C_{61}H_{99}D_9N_{21}O_{19}$   
 Resolution: 5500

**S2D**

| Isotope Number | m/z        | Percent Total | Percent Maximum |
|----------------|------------|---------------|-----------------|
| 0              | 1447.88346 | 44.07         | 100.00          |
| 1              | 1448.88627 | 34.58         | 78.47           |
| 2              | 1449.88891 | 15.10         | 34.27           |
| 3              | 1450.89148 | 4.75          | 10.79           |
| 4              | 1451.89399 | 1.19          | 2.71            |
| 5              | 1452.89646 | 0.25          | 0.57            |
| 6              | 1453.89891 | 0.05          | 0.11            |
| 7              | 1454.90135 | 0.01          | 0.02            |
| 8              | 1455.90385 | 0.00          | 0.00            |
| 9              | 1456.90690 | 0.00          | 0.00            |

GK<sub>d3-ac</sub>GGK<sub>d3-ac</sub>GLGK<sub>d3-ac</sub>GGAK<sub>d3-ac</sub>R  
 Elemental Composition: C<sub>61</sub>H<sub>96</sub>D<sub>12</sub>N<sub>21</sub>O<sub>19</sub>  
 Resolution: 5500

| Isotope Number | m/z        | Percent Total | Percent Maximum |
|----------------|------------|---------------|-----------------|
| 0              | 1450.90694 | 44.05         | 100.00          |
| 1              | 1451.90974 | 34.58         | 78.52           |
| 2              | 1452.91239 | 15.11         | 34.30           |
| 3              | 1453.91496 | 4.76          | 10.80           |
| 4              | 1454.91747 | 1.20          | 2.71            |
| 5              | 1455.91995 | 0.25          | 0.57            |
| 6              | 1456.92240 | 0.05          | 0.11            |
| 7              | 1457.92483 | 0.01          | 0.02            |
| 8              | 1458.92733 | 0.00          | 0.00            |
| 9              | 1459.93038 | 0.00          | 0.00            |

**S2E**

**S2F**

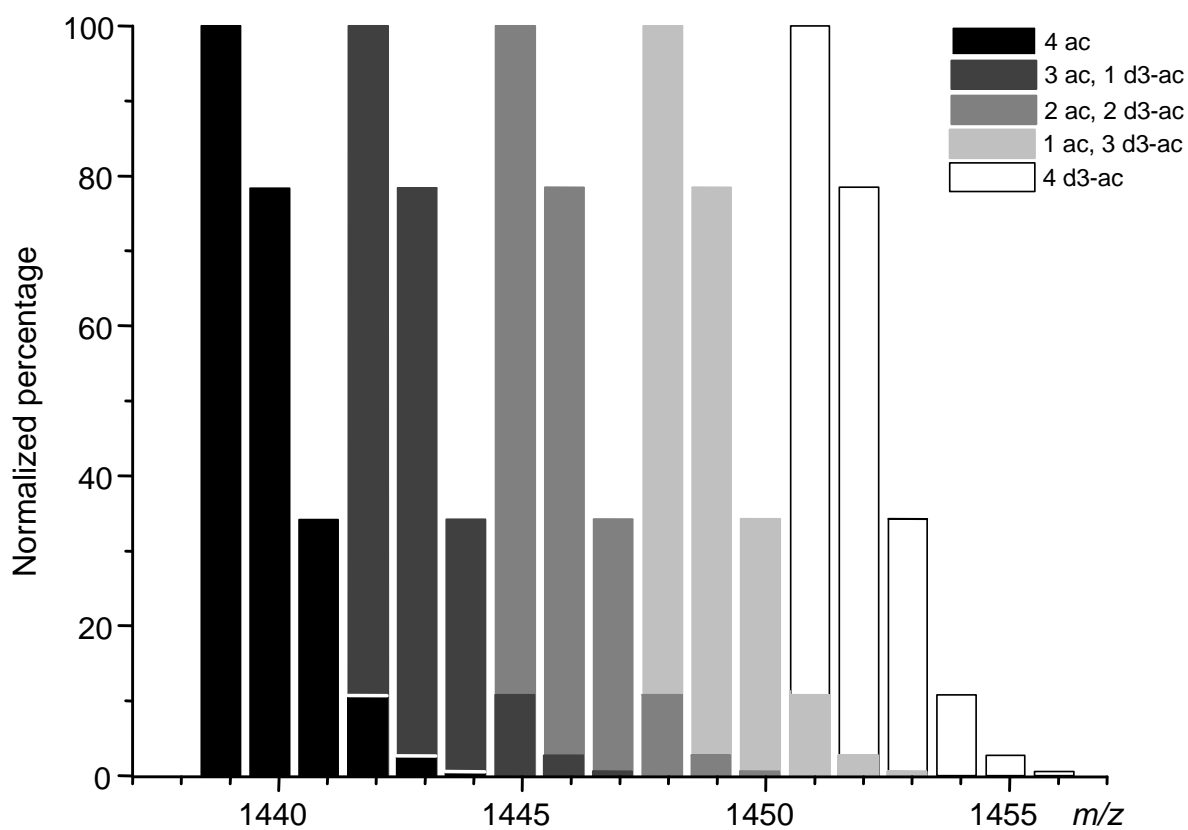

Supplement: NIHMS307644-supplement-01.pdf [file NIHMS307644-supplement-01.pdf]
